# Supplementary material for: The effects of psychological interventions on depression and anxiety among Chinese adults with cancer: a meta-analysis of randomized controlled studies
Source: PubMed Central journal article supplement (PMC4301929; doi:10.1186/1471-2407-14-956), 2014-12-15

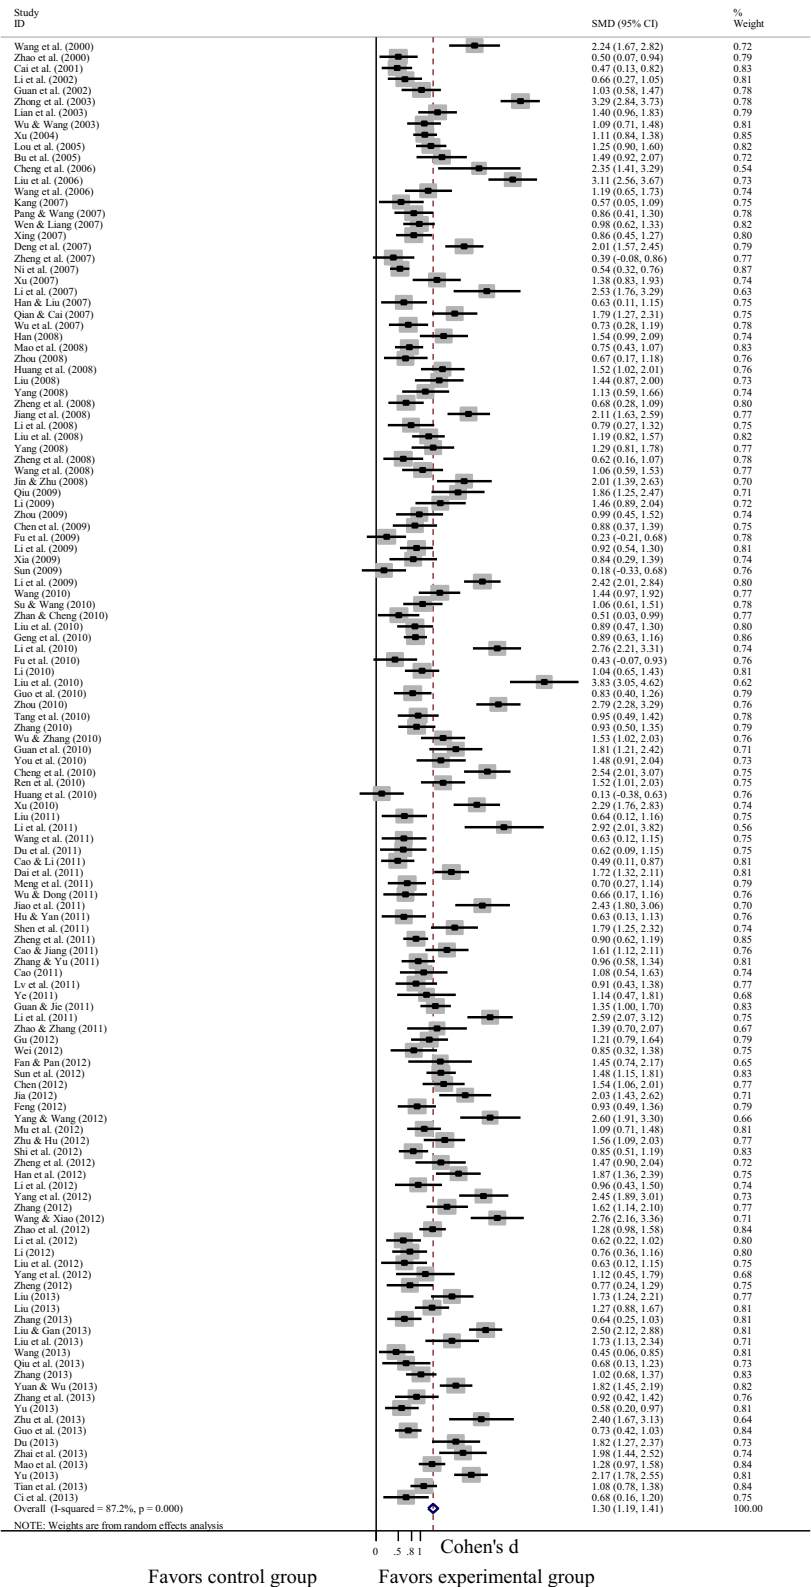

Supplement: 12885_2014_5105_MOESM6_ESM.pdf [file 12885_2014_5105_MOESM6_ESM.pdf]
